# Supplementary material for: Estimated GFR Trajectories in Pediatric and Adult Nephrotic Syndrome: Results From the Nephrotic Syndrome Study Network (NEPTUNE)
Source: PubMed Central journal article supplement — Kidney Med. 2020 Jun 5;2(4):407–17. doi: 10.1016/j.xkme.2020.03.006 (PMC7406843; doi:10.1016/j.xkme.2020.03.006), 2020-06-05
Supplement: mmc1.pdf [file mmc1.pdf]

Fig S1

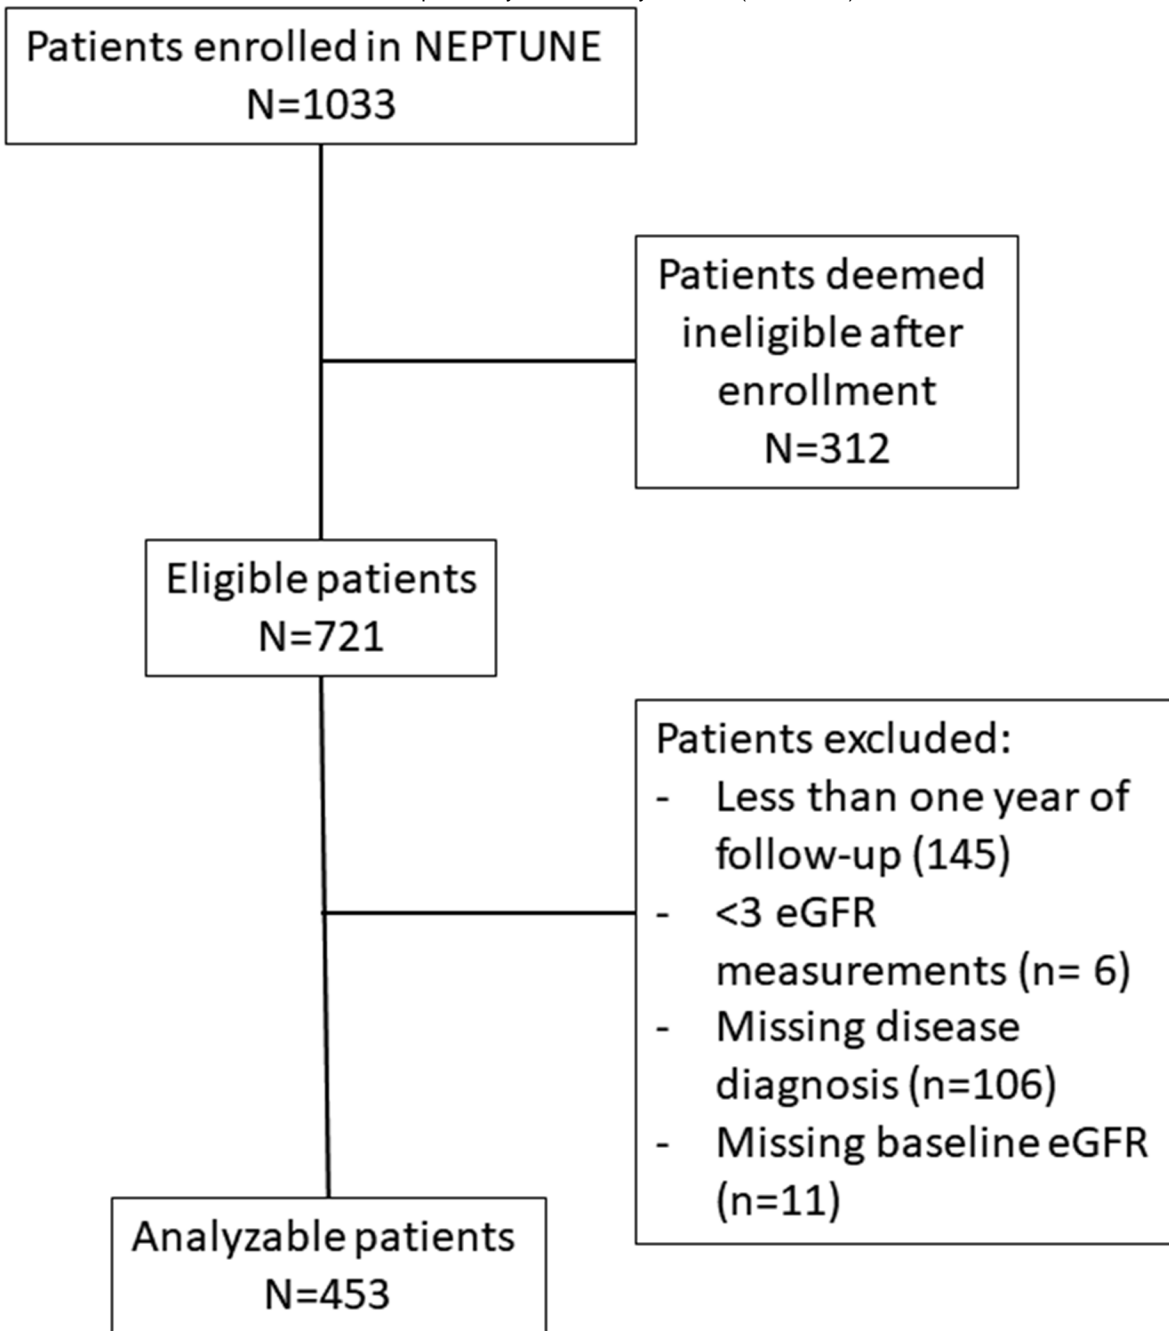

Fig S2

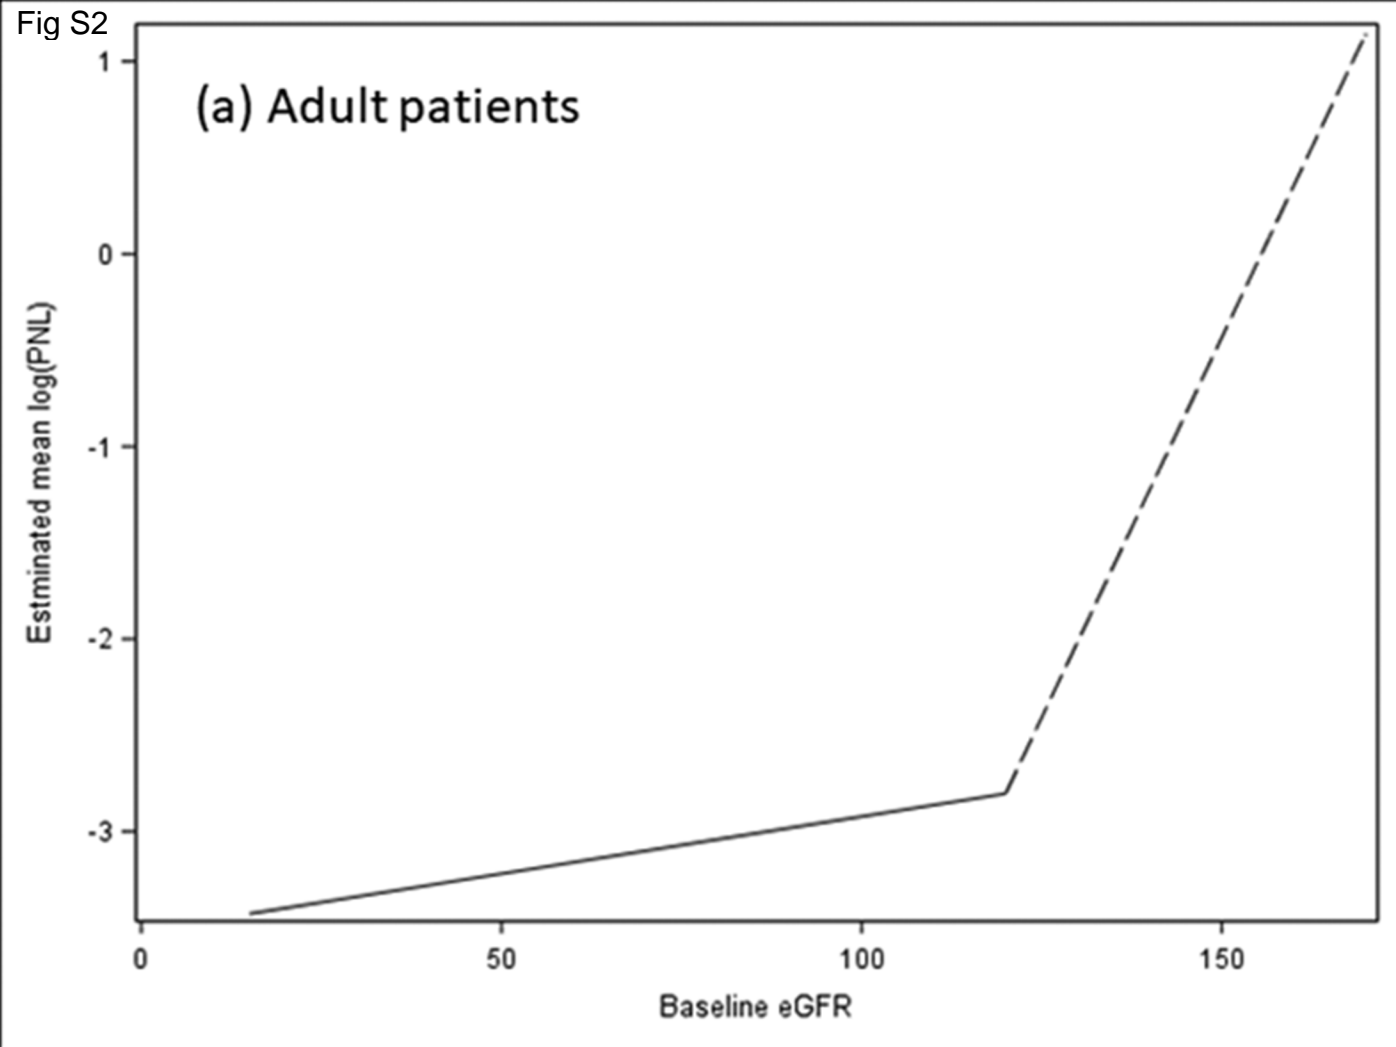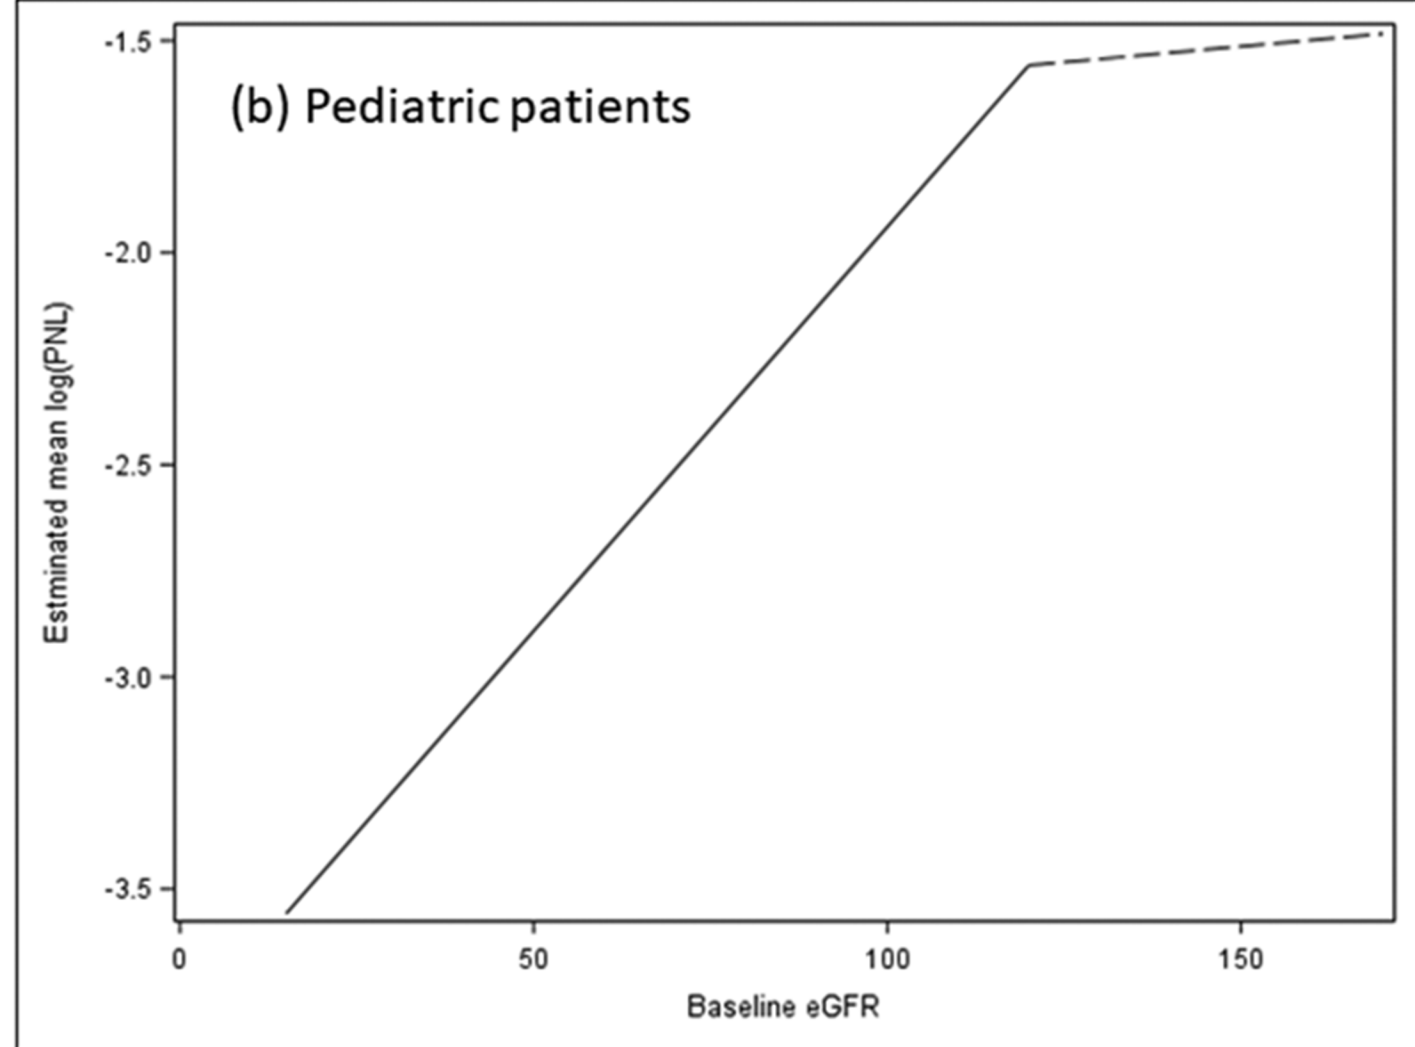

Fig S3

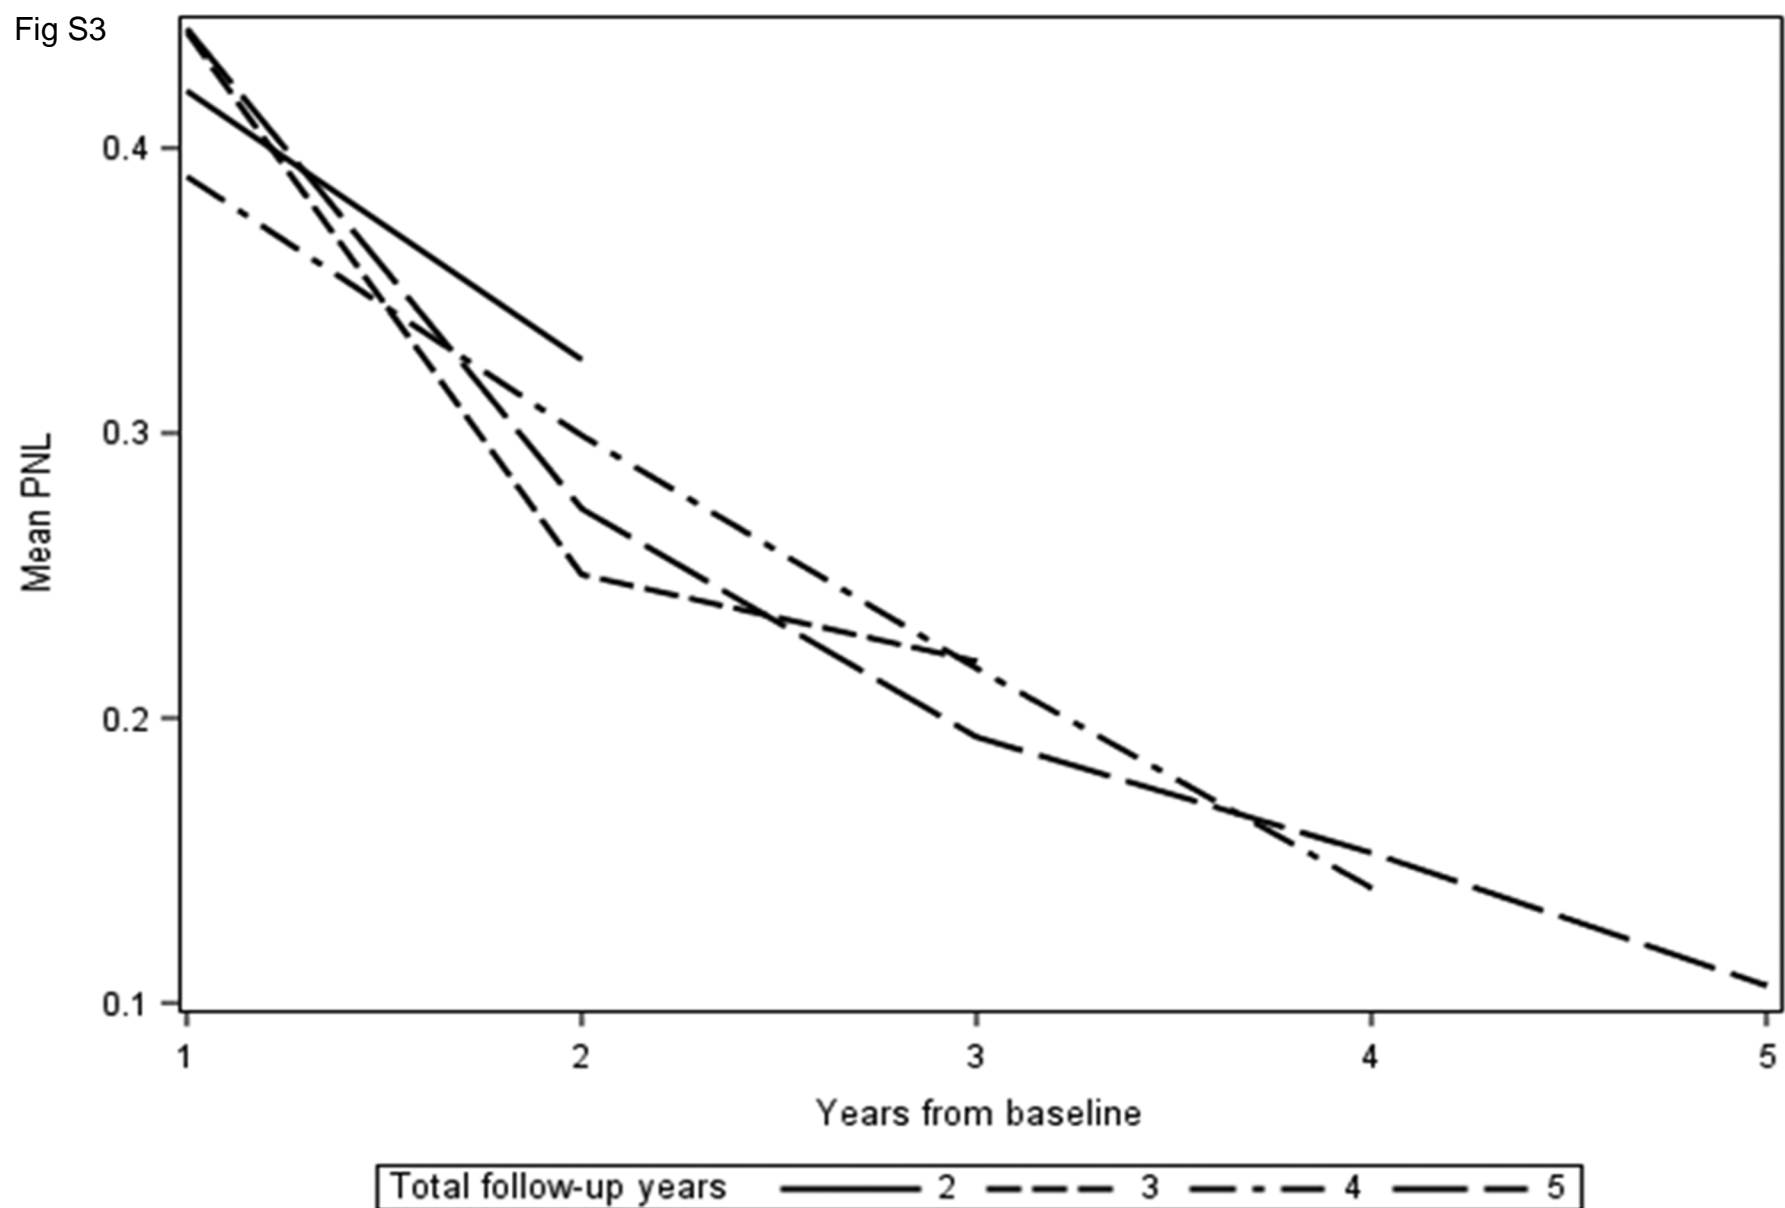

Table S1: Rates of progression to ESKD or 40% decline in eGFR across categories of PNL

| PNL Category                                               | Years from Baseline |       |       |       |       | Overall |
|------------------------------------------------------------|---------------------|-------|-------|-------|-------|---------|
|                                                            | 1                   | 2     | 3     | 4     | 5     |         |
| Rate of ESRD or 40% decline in eGFR per 1000 person months |                     |       |       |       |       |         |
| 0-10%                                                      | 5.7                 | 6.7   | 6.3   | 5.5   | 5.5   | 6.6     |
| 10-50%                                                     | 6.8                 | 7.7   | 6.9   | 6.3   | 9.2   | 9.2     |
| 50-100%                                                    | 10.3                | 11.4  | 11.3  | 14.7  | 9.6   | 13.7    |
| eGFR slope per month                                       |                     |       |       |       |       |         |
| 0-10%                                                      | -0.20               | -0.26 | -0.23 | -0.17 | -0.16 | -0.24   |
| 10-50%                                                     | -0.28               | -0.35 | -0.33 | -0.25 | -0.25 | -0.43   |
| 50-100%                                                    | -0.44               | -0.45 | -0.37 | -0.13 | -0.10 | -0.53   |
